# Supplementary material for: Astrogliosis and sexually dimorphic neurodegeneration and microgliosis in the olfactory bulb in Parkinson’s disease
Source: PubMed Central journal article supplement (PMC7820595; doi:10.1038/s41531-020-00154-7), 2021-01-21
Supplement: 41531_2020_154_MOESM1_ESM.pdf [file 41531_2020_154_MOESM1_ESM.pdf]

Supplementary figure 1. Correlations of Neu-N, GFAP and Iba-1 compared to  $\alpha$ -synuclein

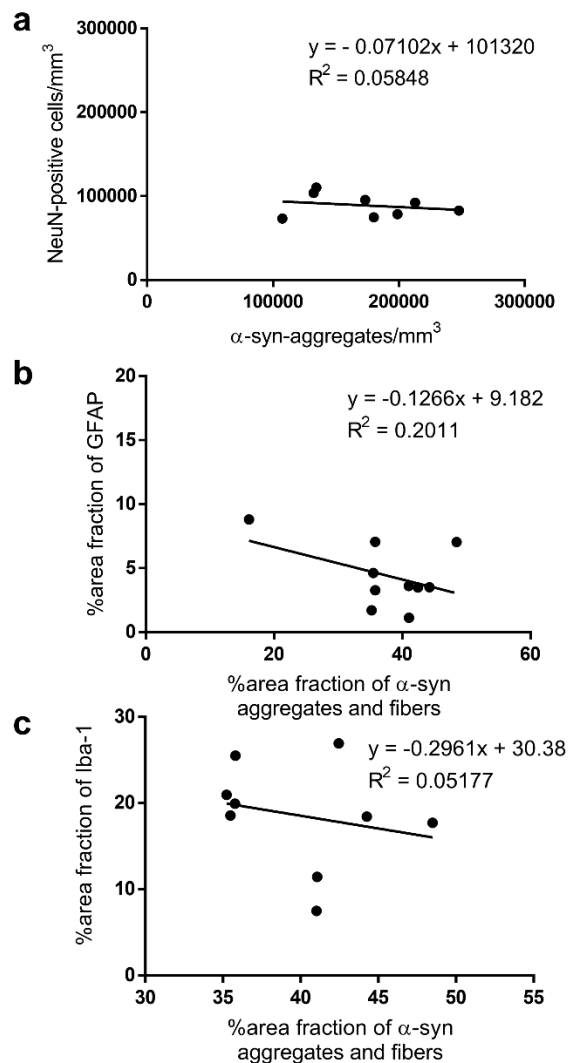

Supplementary Fig. 1. Correlations of Neu-N (cells/mm<sup>3</sup>) compared to  $\alpha$ -synuclein (aggregates/mm<sup>3</sup>) (a), percentage of area fraction of GFAP against percentage of area fraction of  $\alpha$ -synuclein (b) and finally, percentage of area fraction of Iba-1 against percentage of area fraction of  $\alpha$ -synuclein (c).

Supplementary figure 2. Correlations of  $\alpha$ -synuclein, Neu-N, GFAP, Iba-1 compared to disease duration.

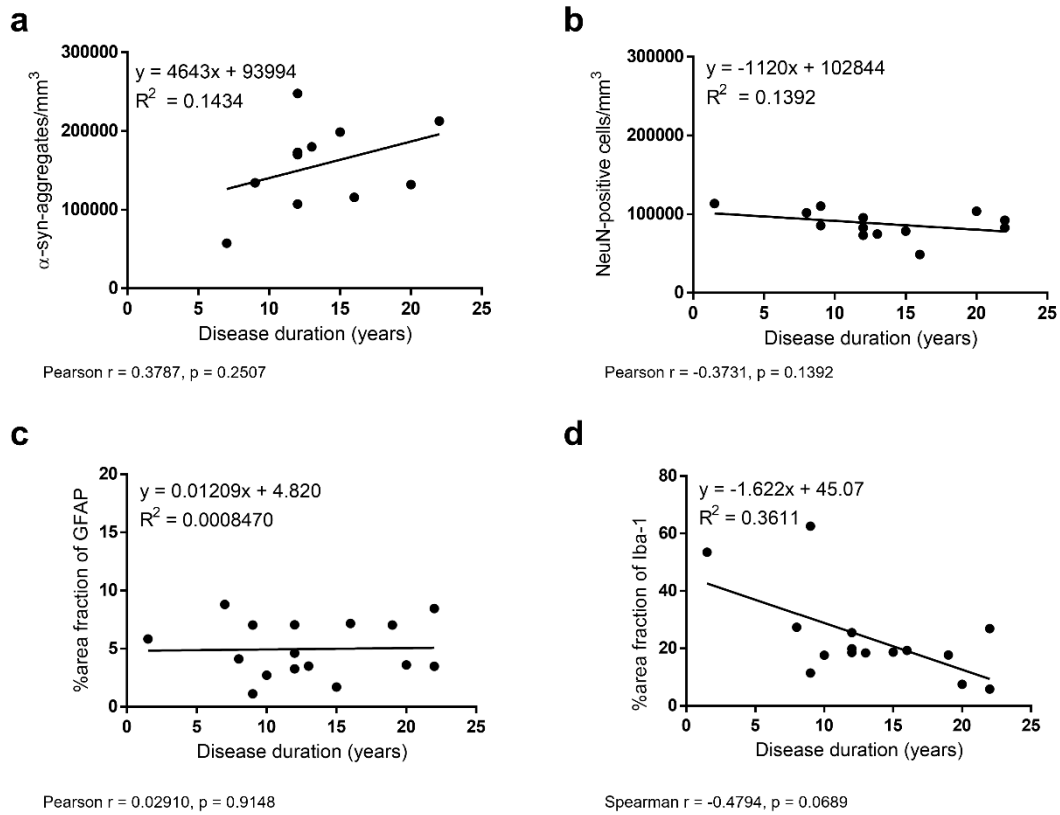

Supplementary Fig. 2. Correlations of  $\alpha$ -synuclein (aggregates/mm<sup>3</sup>), Neu-N (cells/mm<sup>3</sup>), GFAP (percentage of area fraction) and Iba-1 (percentage of area fraction) compared to disease duration, using Pearson and Spearman tests. No substantial correlations were found.

Supplementary figure 3. Correlations of  $\alpha$ -synuclein, Neu-N, GFAP, Iba-1 compared to post-mortem interval.

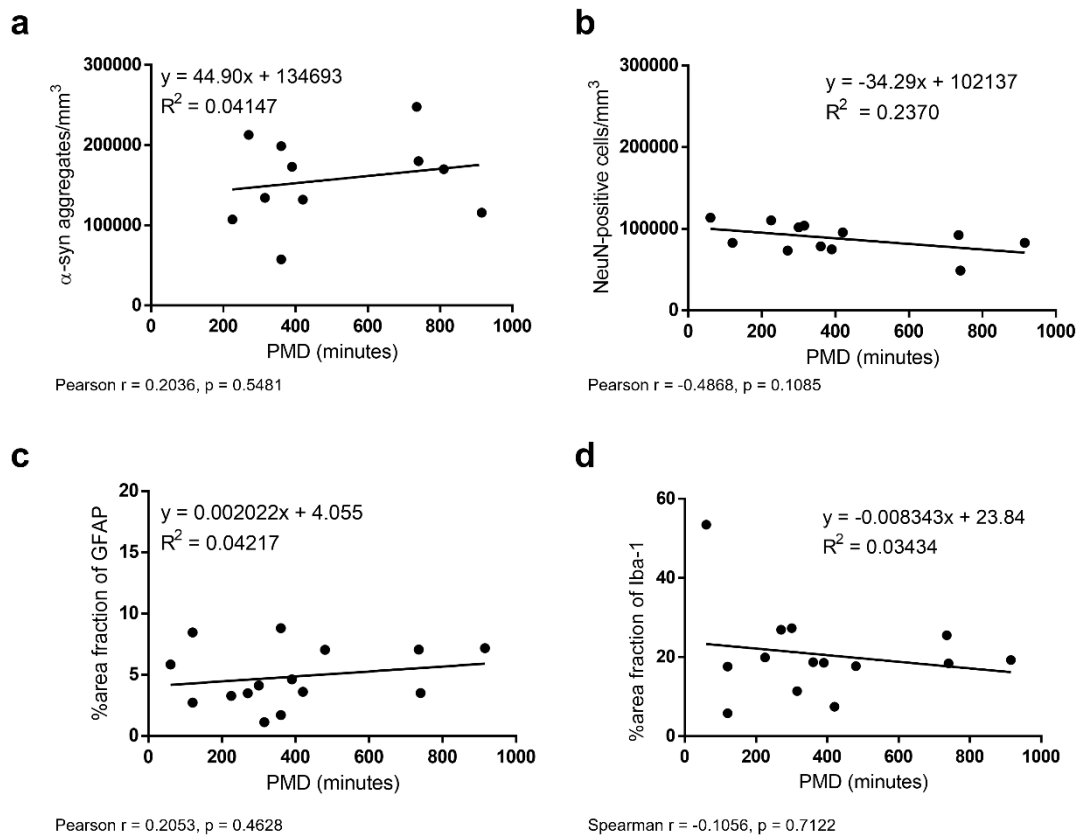

Supplementary Fig. 3. Correlations of  $\alpha$ -synuclein (aggregates/mm<sup>3</sup>), Neu-N (cells/mm<sup>3</sup>), GFAP (percentage of area fraction) and Iba-1 (percentage of area fraction) compared to post-mortem interval, using Pearson and Spearman tests. No correlations were detected.

Supplementary Figure 4. Stereological area fraction fractionator

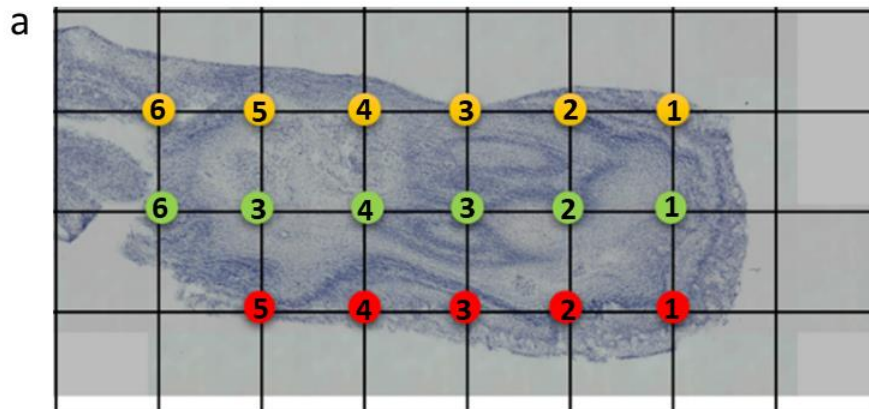

b

| Case | Random number<br>Excel $f_x = \text{RAND}()$ | Even/odd number |
|------|----------------------------------------------|-----------------|
| 1    | 0.93                                         | Odd number      |
| 2    | 0.68                                         | Even number     |
| 3    | 0.73                                         | Even number     |
| 4    | 0.77                                         | Odd number      |
| .    | .                                            | .               |
| .    | .                                            | .               |
| .    | .                                            | .               |

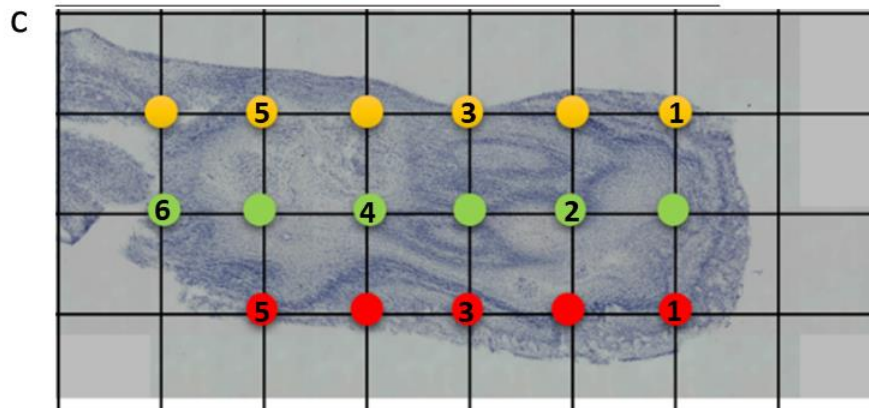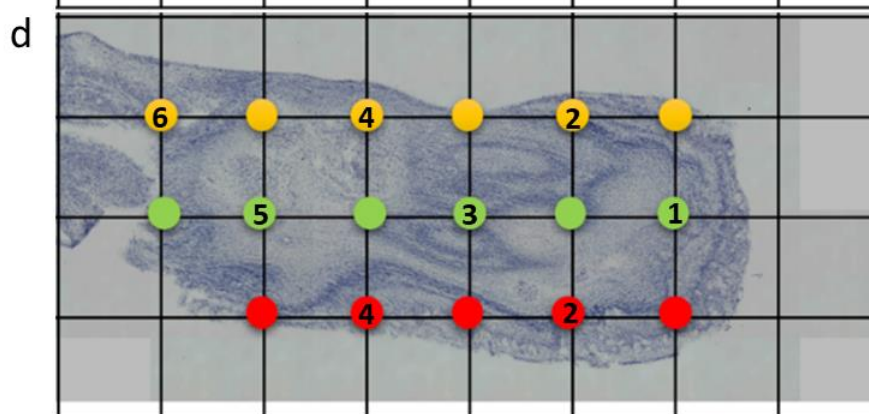

Supplementary Fig. 4. Stereological area fraction fractionator probe to quantify GFAP and Iba-1 staining. Following an unbiased protocol: a millimetric transparent grid simulating an array was randomly overlapped in the slide and crossed matched to the tissue identified (black lines) (a); odd and even numbers were randomly assigned to each human case (b). In odd-numbered cases, the images were taken from the first cross-matching of the tissue following this cross-matching sequence for the first line: 1-3-5-7 (c). In even-numbered cases, the images were captured in the second cross-matching following this sequence: 2-4-6-8 (d). Images were processed with an ImageJ protocol to obtain the percentage of area fraction.
